# Supplementary material
Source: Springer Nature journal article supplement (https://www.springermedizin.de/resource/supplementary/13099_2010_31_MOESM3_ESM.pdf/9665414)

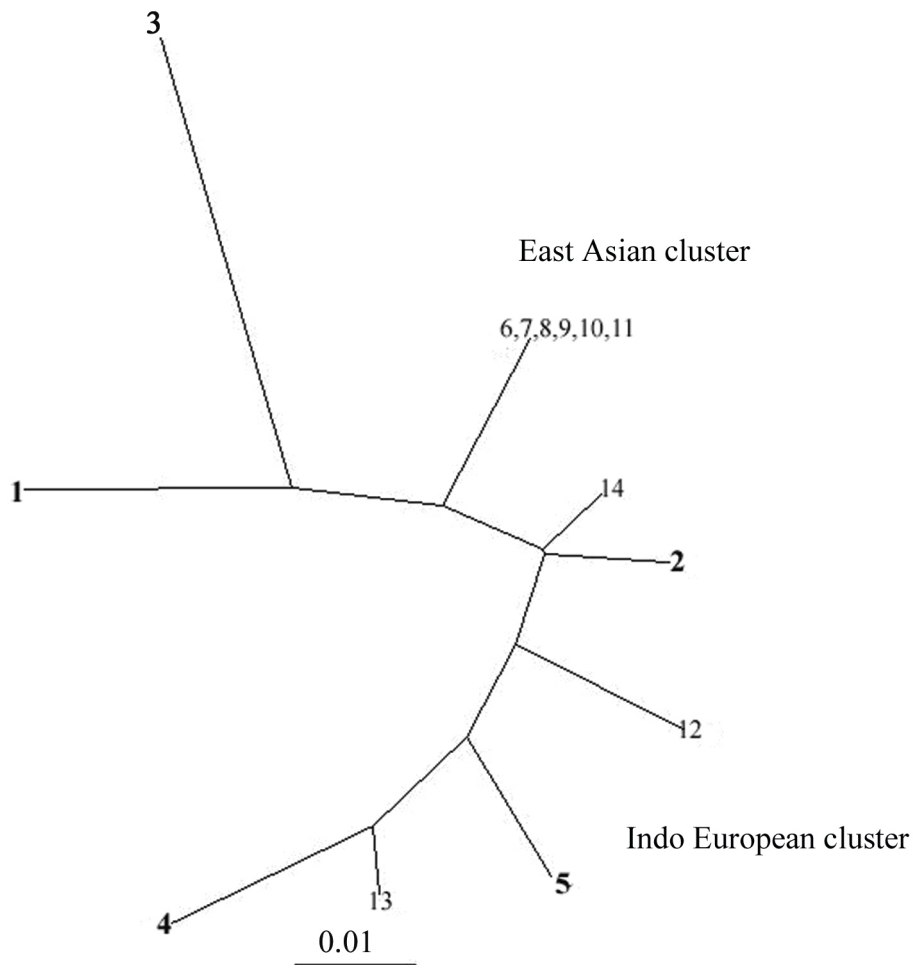

Supplement: MOESM3 [file 9665414]
